# Supplementary material for: Carbon dioxide flushing versus saline flushing of thoracic aortic stents (INTERCEPTevar): protocol for a multicentre pilot randomised controlled trial
Source: PubMed Central journal article supplement — BMJ Open. 2023 Apr 27;13(4):e067605. doi: 10.1136/bmjopen-2022-067605 (PMC10151986; doi:10.1136/bmjopen-2022-067605), 2023-04-27
Supplement: bmjopen-2022-067605supp001.pdf [file bmjopen-2022-067605supp001.pdf]

IRAS Number: 262145  
Patient Identification Number for this trial:

---

**CONSENT FORM**

---

Title of Project:

**INTERCEPTevar; ‘Carbon-Dioxide Flushing versus Saline Flushing of Thoracic Aortic Stents: A Multi-centre Randomised Controlled Trial’**

Chief Investigator: [Mr Richard Gibbs](#)

Please initial all boxes

1. I confirm that I have read and understand the information sheet dated **18/01/2022** **version 2** for the above study. I have had the opportunity to consider the information, ask questions and have had these answered satisfactorily.
2. I understand that my participation is voluntary and that I am free to withdraw at any time without giving any reason, without my medical care or legal rights being affected.
3. I understand that relevant sections of my medical notes and data collected during the study, may be looked at by individuals from **Imperial College London** from regulatory authorities or from the NHS Trust, where it is relevant to my taking part in this research. I give permission for these individuals to have access to my records.
4. I agree to my GP being informed of my participation in the study.
5. I agree to take part in the above study.
6. I give / do not give (**delete as applicable**) consent for samples collected during this study to be used in future ethically approved studies. I give permission for my samples to be sent to other organisations, including these outside of the EEA (European Economic Area)

Consent form date of issue: **18/01/2022**  
Consent form version number: **3**  
IRAS number: 262145

Page 1 of 2

7. I give/do not give **(delete as applicable)** consent to being contacted to potentially taking part in other research studies.

\_\_\_\_\_  
Name of Participant

\_\_\_\_\_  
Date

\_\_\_\_\_  
Signature

\_\_\_\_\_  
Name of Person  
taking consent.

\_\_\_\_\_  
Date

\_\_\_\_\_  
Signature

Consent form date of issue: **18/01/2022**  
Consent form version number: **3**  
IRAS number: 262145

Page 1 of 2
